# Supplementary material
Source: PubMed Central journal article supplement (PMC9160414)
Supplement: NIHMS1809342-supplement-Supplementary_Information.pdf [file NIHMS1809342-supplement-Supplementary_Information.pdf]

---

**Supplementary information**

---

**Single-molecule localization microscopy**

---

In the format provided by the  
authors and unedited

## Supplemental Table 1: Selected commercial reagents for SMLM experiments

This table lists examples of some recommended reagents for newcomers to SMLM. For multi-color imaging, see **Box 2**. For more comprehensive information and/or systematic comparisons of SMLM labeling techniques, see e.g. <sup>1-5</sup> and the protocols described in **Supplementary Note 1**.

| Type of reagent                                                                           | Reagent(s)                                                             | Supplier               | Reference            | Application                                      |
|-------------------------------------------------------------------------------------------|------------------------------------------------------------------------|------------------------|----------------------|--------------------------------------------------|
| Primary antibodies, unlabeled (use with labeled secondary antibodies)                     | Rat anti-tubulin antibody (recognizes the $\alpha$ subunit of tubulin) | Bio-Rad                | <a href="#">link</a> | (d)STORM of microtubules                         |
|                                                                                           | Rabbit anti-nucleoporin Nup133                                         | Abcam                  | <a href="#">link</a> | (d)STORM of nuclear pores in human cells         |
| Secondary antibodies conjugated to synthetic dyes (use with unlabeled primary antibodies) | Anti-rat antibody coupled to Alexa Fluor 647                           | ThermoFisher           | <a href="#">link</a> | dSTORM                                           |
|                                                                                           | Anti-rabbit antibody coupled to Alexa Fluor 647                        | Jackson ImmunoResearch | <a href="#">link</a> | dSTORM                                           |
| Fluorescent protein plasmids                                                              | mEos3.2 plasmid                                                        | Addgene                | <a href="#">link</a> | PALM                                             |
|                                                                                           | mMaple3 plasmid                                                        | Addgene                | <a href="#">link</a> | PALM                                             |
| DNA-PAINT kits                                                                            | DNA-conjugated secondary antibodies/nanobodies (docking strands)       | Massive Photonics      | <a href="#">link</a> | DNA-PAINT                                        |
|                                                                                           | Dye-conjugated DNA (imager strands)                                    | Massive Photonics      | <a href="#">link</a> | DNA-PAINT                                        |
| Direct labeling                                                                           | Phalloidin conjugated to Alex Fluor 647                                | ThermoFisher           | <a href="#">link</a> | dSTORM of actin                                  |
|                                                                                           | MitoTracker Red                                                        | ThermoFisher           | <a href="#">link</a> | Live cell STORM of mitochondrial membranes       |
| Photoswitching buffers                                                                    | SAFe Reagents                                                          | Abbelight              | <a href="#">link</a> | (d)STORM                                         |
|                                                                                           | Everspark                                                              | idylle                 | <a href="#">link</a> | (d)STORM                                         |
| Labeled samples                                                                           | Cells with labeled microtubules, mitochondria, podosomes..             | Abbelight              | <a href="#">link</a> | (d)STORM                                         |
| Fiducial markers                                                                          | TetraSpeck microspheres (100 nm diameter)                              | ThermoFisher           | <a href="#">link</a> | Correction of drift and/or chromatic aberrations |

## Supplementary Note 1: Selected experimental protocols for SMLM

The following is a non-exhaustive list of some recommended experimental protocols for SMLM.

- Van de Linde et al. (ref.<sup>6</sup>) : dSTORM, live cells.
- Gould et al. (ref.<sup>7</sup>) : PALM.
- Schnitzbauer et al. (ref.<sup>8</sup>): DNA-PAINT, multicolor, quantification (qPAINT).
- Jimenez et al. (ref.<sup>9</sup>): dSTORM, DNA-PAINT, multicolor, optimized sample preparation.
- Manley et al. (ref.<sup>10</sup>): spt-PALM.
- Kaplan et al. (ref.<sup>11</sup>): sample preparation optimized for dSTORM in yeast.
- Davis et al. (ref.<sup>12</sup>): how to prepare coverslips to minimize impurities in SMLM

### Supplemental References:

- 1 Turkowyd, B., Virant, D. & Endesfelder, U. From single molecules to life: microscopy at the nanoscale. *Anal Bioanal Chem* **408**, 6885-6911, doi:10.1007/s00216-016-9781-8 (2016).
- 2 Dempsey, G. T., Vaughan, J. C., Chen, K. H., Bates, M. & Zhuang, X. Evaluation of fluorophores for optimal performance in localization-based super-resolution imaging. *Nat Methods* **8**, 1027-1036, doi:10.1038/nmeth.1768 (2011).
- 3 Wang, S., Moffitt, J. R., Dempsey, G. T., Xie, X. S. & Zhuang, X. Characterization and development of photoactivatable fluorescent proteins for single-molecule-based superresolution imaging. *Proc Natl Acad Sci U S A* **111**, 8452-8457, doi:10.1073/pnas.1406593111 (2014).
- 4 Shim, S. H. *et al.* Super-resolution fluorescence imaging of organelles in live cells with photoswitchable membrane probes. *Proceedings of the National Academy of Sciences of the United States of America* **109**, 13978-13983, doi:10.1073/pnas.1201882109 (2012).
- 5 Jradi, F. M. & Lavis, L. D. Chemistry of Photosensitive Fluorophores for Single-Molecule Localization Microscopy. *ACS Chem Biol* **14**, 1077-1090, doi:10.1021/acscchembio.9b00197 (2019).
- 6 van de Linde, S. *et al.* Direct stochastic optical reconstruction microscopy with standard fluorescent probes. *Nature protocols* **6**, 991-1009, doi:10.1038/nprot.2011.336 (2011).
- 7 Gould, T. J., Verkhusha, V. V. & Hess, S. T. Imaging biological structures with fluorescence photoactivation localization microscopy. *Nat Protoc* **4**, 291-308, doi:10.1038/nprot.2008.246 (2009).
- 8 Schnitzbauer, J., Strauss, M. T., Schlichthaerle, T., Schueder, F. & Jungmann, R. Super-resolution microscopy with DNA-PAINT. *Nat Protoc* **12**, 1198-1228, doi:10.1038/nprot.2017.024 (2017).
- 9 Jimenez, A., Friedl, K. & Leterrier, C. About samples, giving examples: Optimized Single Molecule Localization Microscopy. *Methods* **174**, 100-114, doi:10.1016/j.ymeth.2019.05.008 (2020).

- 10 Manley, S., Gillette, J. M. & Lippincott-Schwartz, J. Single-particle tracking photoactivated localization microscopy for mapping single-molecule dynamics. *Methods Enzymol* **475**, 109-120, doi:10.1016/S0076-6879(10)75005-9 (2010).
- 11 Kaplan, C. & Ewers, H. Optimized sample preparation for single-molecule localization-based superresolution microscopy in yeast. *Nat Protoc* **10**, 1007-1021, doi:10.1038/nprot.2015.060 (2015).
- 12 Davis, J. L., Dong, B., Sun, C. & Zhang, H. F. Method to identify and minimize artifacts induced by fluorescent impurities in single-molecule localization microscopy. *J Biomed Opt* **23**, 1-14, doi:10.1117/1.JBO.23.10.106501 (2018).
